# Supplementary material
Source: bioRxiv or medRxiv preprint supplement (https://www.biorxiv.org/highwire/filestream/69036/field_highwire_adjunct_files/3/216754-12.pdf)
Supplement: Supplementary file [file 216754-12.pdf]

Supplementary Table 3: prediction AMARETTO results given CNV data only, MET data only or both CNV and MET data

|          | Rsquare     |             |             | MSE         |             |             | Rsquare increase with MET | MSE decrease with MET |
|----------|-------------|-------------|-------------|-------------|-------------|-------------|---------------------------|-----------------------|
|          | CNV         | MET         | CNV and MET | CNV         | MET         | CNV and MET |                           |                       |
| BLCA     | 0.63491905  | 0.75918536  | 0.747088771 | 0.129120599 | 0.085754521 | 0.089623734 | 11%                       | 4%                    |
| BRCA     | 0.55196631  | 0.68744417  | 0.707869718 | 0.134388745 | 0.0974036   | 0.089678172 | 16%                       | 4%                    |
| COADREAD | 0.560722577 | 0.686874503 | 0.706325299 | 0.13707469  | 0.097421053 | 0.092378388 | 15%                       | 4%                    |
| GBM      | 0.625180223 | 0.711656734 | 0.717314742 | 0.140220484 | 0.113400472 | 0.11207482  | 9%                        | 3%                    |
| HNSC     | 0.631380908 | 0.744118759 | 0.743615174 | 0.140991015 | 0.099974654 | 0.098737876 | 11%                       | 4%                    |
| KIRC     | 0.651631817 | 0.734516833 | 0.712217622 | 0.123120399 | 0.095397403 | 0.101818509 | 6%                        | 2%                    |
| LAML     | 0.611068775 | 0.757019741 | 0.738212603 | 0.150347928 | 0.091011585 | 0.101038635 | 13%                       | 5%                    |
| LUAD     | 0.602504957 | 0.682858619 | 0.696236704 | 0.131973988 | 0.0995979   | 0.095490869 | 9%                        | 4%                    |
| LUSC     | 0.65723949  | 0.716856013 | 0.71251301  | 0.111968514 | 0.101453676 | 0.092118849 | 6%                        | 2%                    |
| OV       | 0.562328171 | 0.64142021  | 0.667417273 | 0.114725012 | 0.096584823 | 0.088217345 | 11%                       | 3%                    |
| UCEC     | 0.5214479   | 0.685517255 | 0.665556488 | 0.148878157 | 0.101523068 | 0.107419615 | 14%                       | 4%                    |
